# Supplementary material
Source: MDPI journal article supplement (https://www.mdpi.com/2076-3298/9/6/72)
Supplement: s1 [file s1]

Archive with 1 entries (1 files):
- environments-1712002-supplementary.pdf
