# Supplementary material
Source: MDPI journal article supplement (https://www.mdpi.com/2076-3298/9/6/72)
Supplement: s1 [file s1 › environments-1712002-supplementary.pdf]

## Supplemental Materials

Table S1. Raman spectroscopy of reference samples and samples collected in this work.

| Vibration mode |  | Krishnamurti 1960 | Carter et al. 2008 |          | Observed Raman Wavenumbers (cm <sup>-1</sup> ) |          |           |          |        |           |          |         |         |            |
|----------------|--|-------------------|--------------------|----------|------------------------------------------------|----------|-----------|----------|--------|-----------|----------|---------|---------|------------|
|                |  | Aragonite         | Aragonite          | Calcite  | MnOx 3 day                                     |          |           |          |        |           | HA 3 day |         |         | 30 min raw |
|                |  |                   |                    |          | Spot 5-8                                       | spot 5-1 | spot 3a-1 | Spot 3-1 | carb-2 | carb - 1b | point 1  | point 4 | point 5 | Spot 785   |
| lattice        |  | 105 w             | 111 w              | 155 m    |                                                |          |           |          |        |           |          |         |         |            |
|                |  | 114 m             | 116 w              |          |                                                |          |           |          |        |           |          |         |         |            |
|                |  | 133 v.w           | 140 sh             |          | 133                                            | 128      | 151       | 139      | 148    | 140       | 147      | 111     | 118     | 146        |
|                |  | 143 m             | 152 s              |          |                                                |          |           |          |        |           |          |         |         |            |
|                |  | 153 v.s           | 178 w              |          |                                                |          |           |          |        |           |          |         |         |            |
|                |  | 162 m             | 190 v.w            |          |                                                |          |           |          |        |           |          |         |         |            |
|                |  | 180 s             | 205 m              |          |                                                |          |           |          |        |           |          |         |         |            |
|                |  | 191 s             | 215 sh             |          |                                                |          |           |          |        |           |          |         |         |            |
|                |  | 206 v.s           | 248 w              |          |                                                |          |           |          |        |           |          |         |         |            |
|                |  | 216 m             | 260 w              |          | 269                                            | 268      | 277       | 267      | 274    | 268       | 276      | 271     | 277     | 272        |
|                |  | 222 v.w           | 272 w              |          |                                                |          |           |          |        |           |          |         |         |            |
|                |  | 250 m             | 284 w              | 281 s    |                                                |          |           |          |        |           |          |         |         |            |
|                |  | 262 m             |                    |          |                                                |          |           |          |        |           |          |         |         |            |
|                |  | 273 m             |                    |          |                                                |          |           |          |        |           |          |         |         |            |
|                |  | 285 m             |                    |          |                                                |          |           |          |        |           |          |         |         |            |
|                |  |                   |                    |          |                                                |          |           |          |        |           |          |         |         |            |
| internal       |  |                   | 697 sh             |          |                                                |          |           |          |        |           |          |         |         |            |
|                |  | 702 m             | 702                | 712 m    |                                                |          |           |          |        |           |          |         |         |            |
|                |  | 707 m             | 706                |          | 711                                            | 711      | 713       | 711      | 712    | 711       | 712      |         |         | 711        |
|                |  | 716 w             | 716                |          |                                                |          |           |          |        |           |          |         |         |            |
|                |  |                   |                    |          |                                                |          |           |          |        |           |          |         |         |            |
|                |  | 854 m             | 853 v.w            |          |                                                |          |           |          |        |           |          |         |         |            |
|                |  |                   |                    |          | 1011                                           |          | 1013      | 1010     | 1013   | 1009      | 1012     |         |         | 1012       |
|                |  | 1086 v.s          | 1085 v.s           | 1086 v.s | 1083                                           | 1083     | 1086      | 1083     | 1084   | 1083      | 1085     | 1085    | 1085    | 1084       |
|                |  |                   |                    |          |                                                |          |           |          |        |           |          |         |         |            |
| v3             |  | 1415 m            | 1462 v.w           | 1430 w   |                                                |          |           |          |        |           |          |         |         |            |
|                |  | 1463 s            |                    |          |                                                |          |           |          |        |           |          |         |         |            |

v.s: very strong, s: strong, m: medium, w: weak, v.w: very weak, sh: shoulder

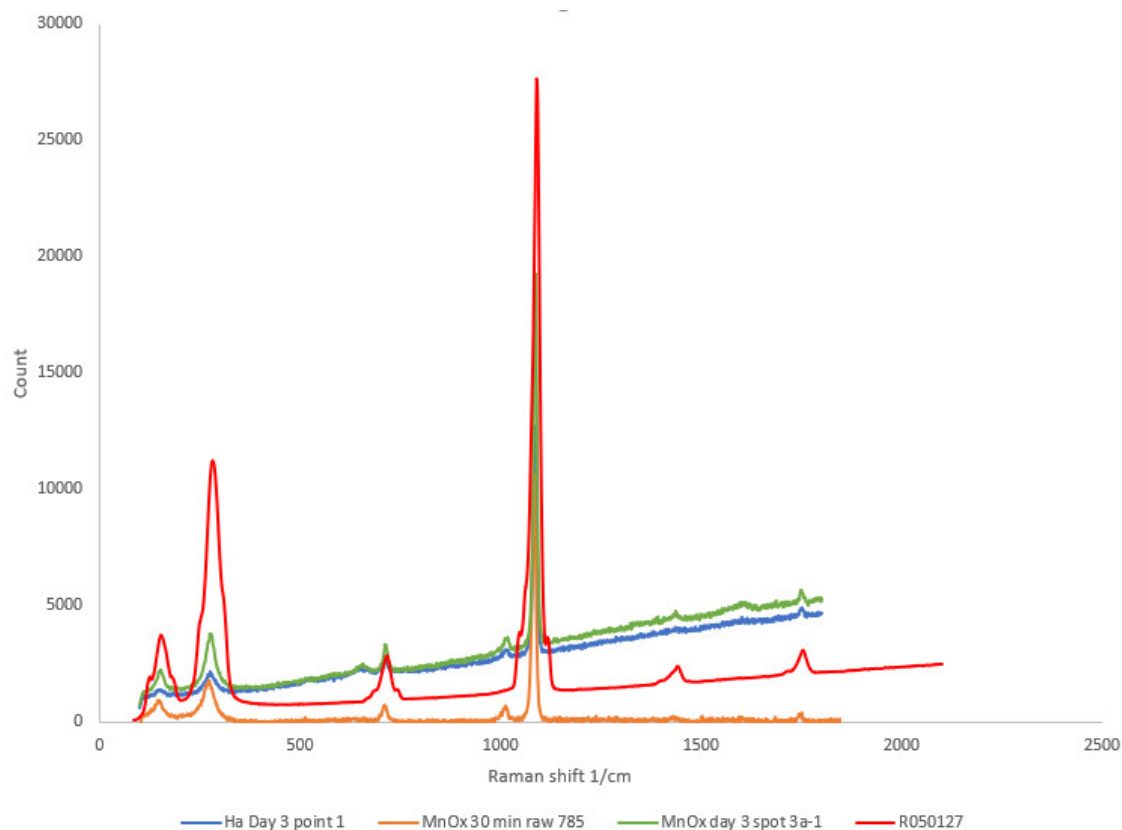

Figure S1. Sample R050127 is a pure calcite (light red), HA Day 3 point 1 sample (blue) is a precipitate on the media pretreated with haloacetic acid where media submerged in water for 3 days, MnOx 30 min raw 785 (orange) where media was not pretreated with and was submerged for 30 min, sample MnOx 3 day spot 3a-1 media was not pretreated with anything and it was submerged for 3 days (green).

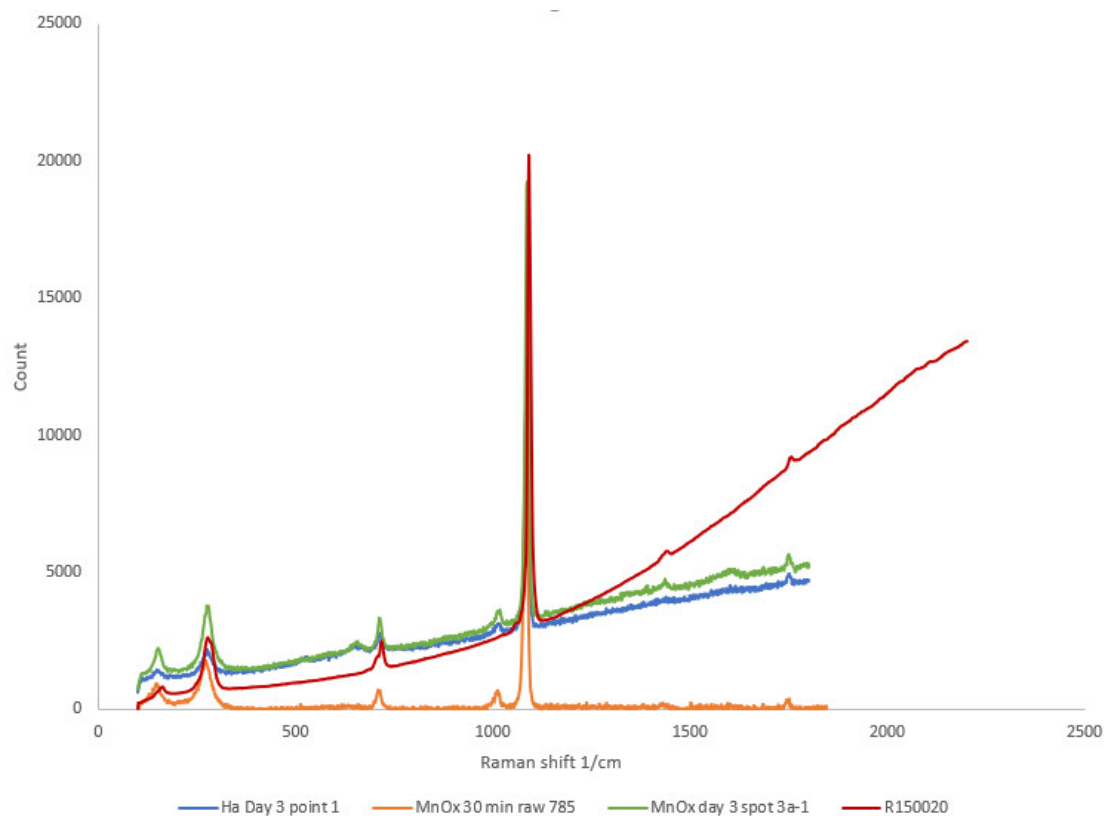

Figure S2. Sample R050020 is a calcite with 99.3% of calcium and trace amounts of strontium (dark red), HA Day 3 point 1 sample (blue) is a precipitate on the media pretreated with haloacetic acid where media submerged in water for 3 days, MnOx 30 min raw 785 (orange) where media was not pretreated with and was submerged for 30 min, sample MnOx 3 day spot 3a-1 media was not pretreated with anything and it was submerged for 3 days (green).
